# Supplementary material for: A mechanism for two-step thermal decomposition of 2,6-diamino-3,5-dinitropyrazine-1-oxide (LLM-105)
Source: Royal Society of Chemistry journal article supplement (doi:10.1039/d0cp02159h), 2020-01-01
Supplement: d0cp02159h1.pdf [file d0cp02159h1.pdf]

# Origin Determination of Multistep Thermal Decomposition of 2,6-Diamino-3,5-dinitropyrazine-1-oxide (LLM-105)

**Qian Yu, Chuande Zhao, Longyu Liao, Hongzhen Li, Heliang Sui, Ying Yin,  
and Jinshan Li\***

*Institute of Chemical Materials, China Academy of Engineering Physics (CAEP), P. O. Box 919-311, Mianyang, 621900, P. R. China*

## Supporting Information

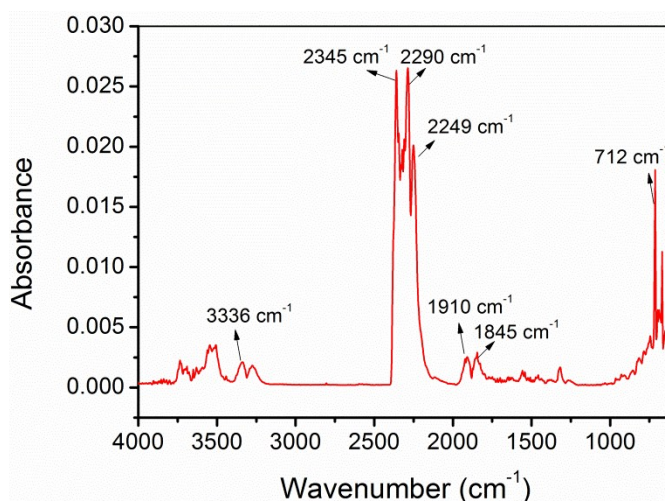

Fig. S1 IR spectra of evolved gaseous products of LLM-105 at 340 °C

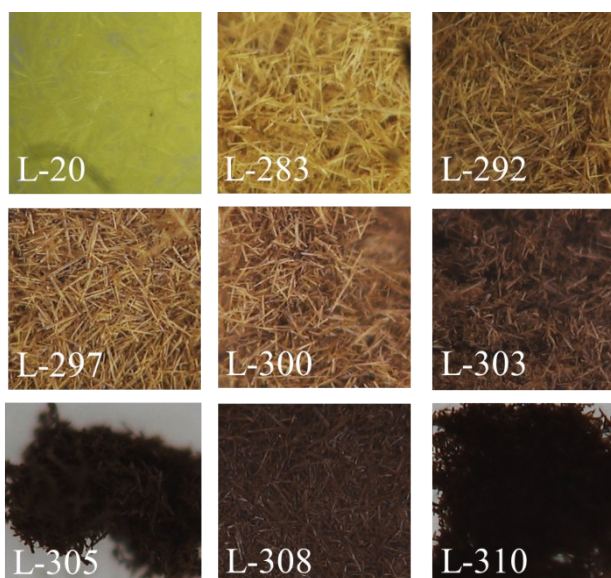

\*J. Li, email: [ljs915@263.net](mailto:ljs915@263.net).

Fig. S2 Photomicrographs of different quenched LLM-105 samples

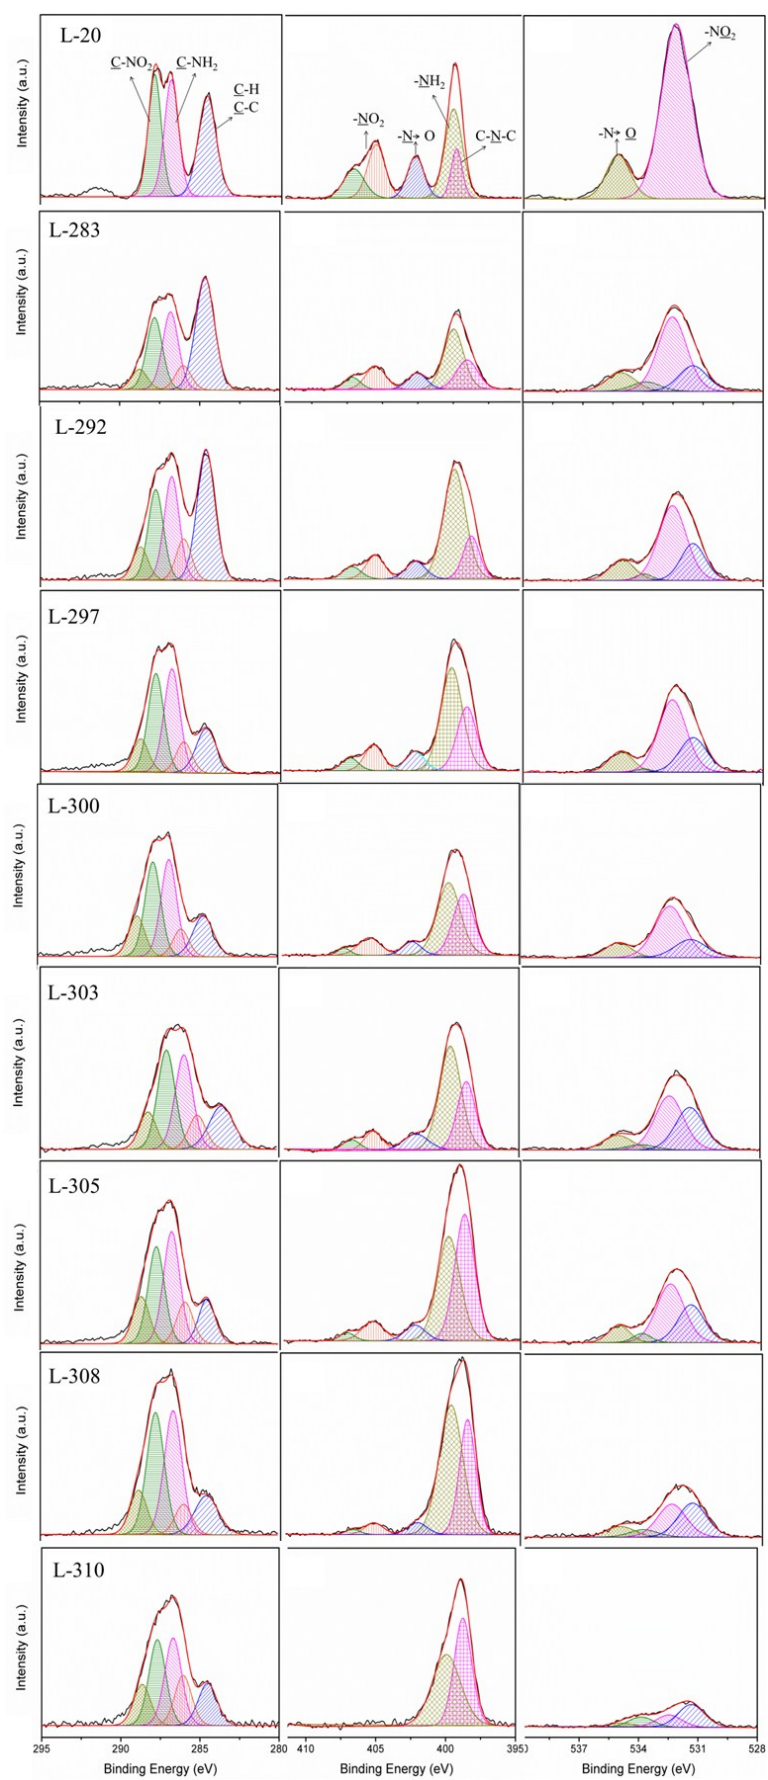

Fig. S3 XPS spectra of LLM-105 quenched at different temperatures

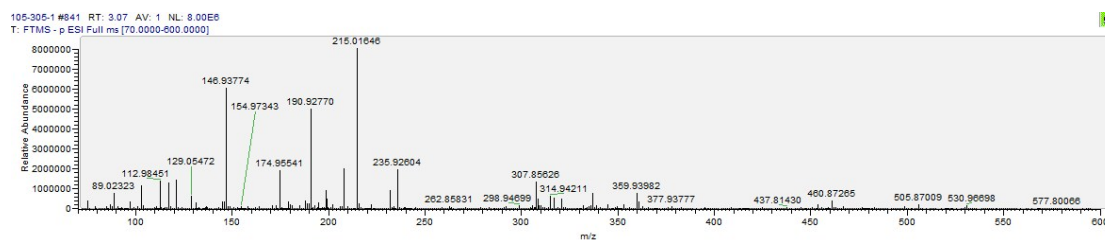

Fig. S4 Mass spectra of LLM-105 for the chromatographic peak at 3.07 minutes

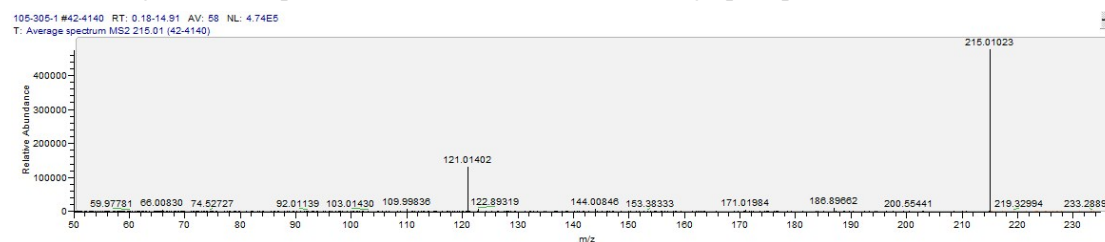

Fig. S5 MS/MS of LLM-105 adduct ion at  $m/z$  215.01

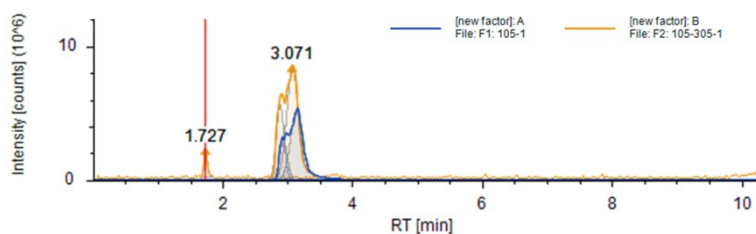

Fig. S6 LC spectra of LLM-105 and L-305

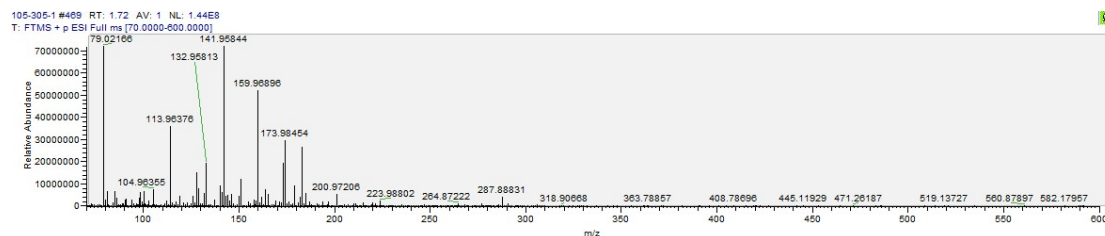

Fig. S7 Mass spectra of L-305 for the chromatographic peak at 1.72 minutes

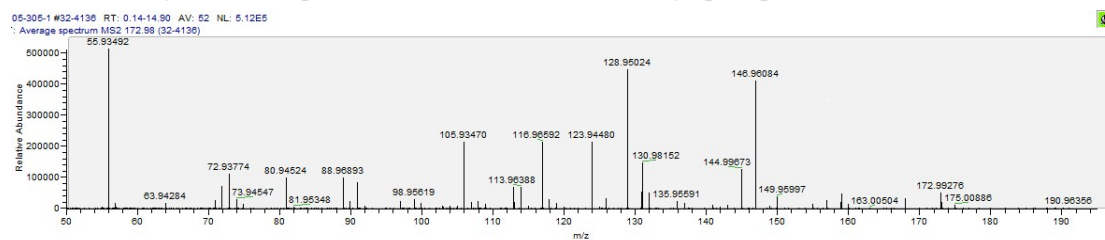

Fig. S8 MS/MS of L-305 adduct ion at  $m/z$  172.98

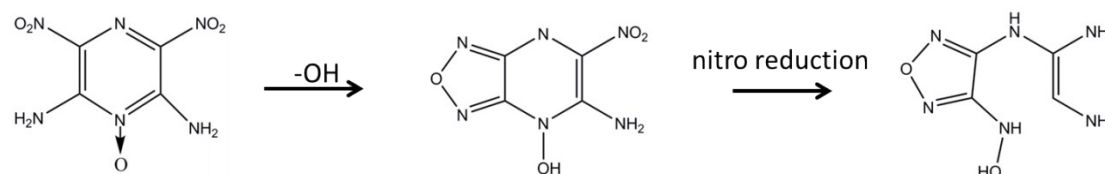

Fig. S9 Degradation pathway of LLM-105 to the intermediate

Table 1 Elemental contents of LLM-105 at different quenched time

| <b>Sample</b> | <b>C content /<br/>%</b> | <b>Deviation<br/>/ %</b> | <b>N content /<br/>%</b> | <b>Deviation<br/>/ %</b> | <b>O content/<br/>%</b> | <b>Deviation<br/>/ %</b> |
|---------------|--------------------------|--------------------------|--------------------------|--------------------------|-------------------------|--------------------------|
| <b>L-20</b>   | 22.22                    | -                        | 38.89                    | -                        | 37.04                   | -                        |
| <b>L-283</b>  | 29.27                    | 0.49                     | 40.33                    | 0.38                     | 30.40                   | 0.66                     |
| <b>L-292</b>  | 29.93                    | 0.28                     | 40.91                    | 0.28                     | 29.15                   | 0.20                     |
| <b>L-297</b>  | 30.39                    | 0.98                     | 41.37                    | 0.46                     | 28.23                   | 0.58                     |
| <b>L-300</b>  | 32.40                    | 0.52                     | 41.30                    | 0.31                     | 26.29                   | 0.39                     |
| <b>L-303</b>  | 34.30                    | 0.18                     | 42.30                    | 0.37                     | 23.39                   | 0.28                     |
| <b>L-305</b>  | 37.52                    | 1.25                     | 41.38                    | 1.13                     | 21.09                   | 0.14                     |
| <b>L-308</b>  | 39.31                    | 3.54                     | 49.51                    | 1.18                     | 11.19                   | 2.36                     |
| <b>L-310</b>  | 38.70                    | 1.36                     | 53.14                    | 0.81                     | 8.17                    | 0.99                     |
